# Supplementary material
Source: MDPI journal article supplement (https://www.mdpi.com/2076-3298/5/5/62)
Supplement: s1 [file s1]

**Table S3.** Concentrations of PAHs on PM<sub>2.5</sub> at several sites around world.

| PAHs  | São Pablo <sup>a</sup> | Temuco and Santiago <sup>b</sup> | Atlanta <sup>c</sup> | California (×10 <sup>-3</sup> ) <sup>d</sup> | Zaragoza <sup>e</sup> | Porto <sup>f</sup> | Nanjin <sup>g</sup> | Zhengzhou <sup>h</sup> |
|-------|------------------------|----------------------------------|----------------------|----------------------------------------------|-----------------------|--------------------|---------------------|------------------------|
| Acy   | 0.09                   | <i>n.r</i>                       | 0.003-0.010          | <i>n.r</i>                                   | <i>n.r</i>            | 6.0                | 0.02-0.03           | 0.6-2.4                |
| Acn   | 0.35                   | <i>n.r</i>                       | 0.004-0.007          | 0.39-3.17                                    | <i>n.r</i>            | 1.9                | 0.02-0.04           | 0.2-1.8                |
| Flu   | -                      | 14.0-27.2                        | 0.044-0.088          | 2.35-9.85                                    | <i>n.r</i>            | 6.3                | 0.3-0.6             | 0.8-2.5                |
| Phe   | 0.18                   | 28.0-50.6                        | 0.017-0.065          | 1.46-36.5                                    | 0.18                  | 12.3               | 0.24-0.46           | 5.3-7.7                |
| Ant   | -                      | 3.1-6.9                          | 0.004-0.012          | 0.16-3.18                                    | 0.01                  | 1.04               | 0.02-0.07           | 6.0-8.6                |
| Flt   | 0.68                   | 5.3-18.9                         | 0.007-0.088          | 4.51-47.9                                    | 0.21                  | 3.14               | 0.05-0.18           | 13.2-24.7              |
| Pyr   | 0.52                   | 8.1-15.5                         | 0.004-0.097          | 5.51-69.5                                    | 0.20                  | 2.57               | 0.3-0.56            | 10.6-18.4              |
| BaA   | 0.46                   | 1.2-115.7                        | 0.003-0.170          | 6.26-41.2                                    | 0.13                  | 0.26               | 0.26-0.44           | 8.5-20.1               |
| Chry  | 0.51                   | <i>s.i</i>                       | 0.008-0.177          | 7.98-56.7                                    | 0.23                  | 0.50               | 0.47-0.78           | 16.7-24.3              |
| BbF   | 1.23                   | <i>s.i</i>                       | 0.017-0.664          | 11.7-99.1                                    | 0.21                  | <i>s.i</i>         | 1.13-1.5            | 22.0-38.6              |
| BkF   | 0.76                   | <i>s.i</i>                       | 0.005-0.219          | 5.80-52.8                                    | 0.06                  | <i>s.r</i>         | 0.29-0.42           | 9.5-27.1               |
| BaP   | 0.52                   | 1.8-98.5                         | 0.006-0.492          | 9.01-99.9                                    | 0.12                  | 0.28               | 0.52-0.72           | 8.1-11.6               |
| IcdP  | 2.47                   | 2.4-68.8                         | 0.017-0.420          | 12.3-100                                     | <i>s.i</i>            | 0.30               | 0.81-1.01           | 8.2-16.2               |
| BghiP | 2.36                   | 5.7-37.8                         | 0.032-0.668          | 23.3-174                                     | 0.16                  | 0.29               | 0.92-1.11           | 8.4-12.5               |

<sup>a</sup> São Pablo, Brazil [24], <sup>b</sup> Min-Max of Mean found in Temuco and Santiago, Chile [25], <sup>c</sup> Min-Max of average concentrations of PAHs on PM 2.5 at three sampling sites in Atlanta, USA [26], <sup>d</sup> Min-Max of annual averaged concentrations at five distinct sites in California, USA [27], <sup>e</sup> Averaged concentrations of PAHs obtained during two seasons at Zaragoza, Spain [28], <sup>f</sup> Averaged annual concentration at Porto, Portugal [30], <sup>g</sup> Min-Max of concentrations of PAHs species in PM<sub>2.5</sub> before, during and after the Asian Youth Games, China [31 ], <sup>h</sup> Min-Max of annual mean from 2011 to 2013 Zhengzhou, China [33], *n.r.*: no reported concentrations, *s.i.*: sum of isomers.
