# Supplementary material
Source: MDPI journal article supplement (https://www.mdpi.com/2076-3298/5/5/62)
Supplement: s1 [file s1]

**Table S1.** PAHs atmospheric concentrations (ng·m<sup>-3</sup>) on PM<sub>2.5</sub> and meteorological conditions in Centro site (2009–2010).

| PAHs    | Warm-dry season ( <i>n</i> =4) |                  | Rainy season ( <i>n</i> =14) |                  | Cold-dry season ( <i>n</i> =5) |                  | Annual period ( <i>n</i> =23) |                  |
|---------|--------------------------------|------------------|------------------------------|------------------|--------------------------------|------------------|-------------------------------|------------------|
|         | Mean±SD                        | Median (10-90th) | Mean±SD                      | Median (10-90th) | Mean±SD                        | Median (10-90th) | Mean±SD                       | Median (10-90th) |
| Acy     | 0.11±0.07                      | 0.07 (0.06-0.17) | 0.15±0.16                    | 0.06 (0.03-0.33) | 0.10 <sup>a</sup>              | -                | 0.13±0.12                     | 0.07 (0.04-0.30) |
| Acn     | n.d.                           | -                | 0.05±0.05                    | 0.03 (0.02-0.11) | 0.09±0.08                      | 0.06 (0.04-0.16) | 0.07±0.06                     | 0.06 (0.02-0.14) |
| Flu     | n.d.                           | -                | 0.11±0.09                    | 0.08 (0.05-0.20) | 0.17±0.16                      | 0.13 (0.04-0.33) | 0.14±0.13                     | 0.10 (0.04-0.27) |
| Phe     | 0.13±0.05                      | 0.12 (0.09-0.18) | 0.12±0.15                    | 0.09 (0.02-0.18) | 0.29±0.47                      | 0.09 (0.05-0.72) | 0.16±0.24                     | 0.09 (0.02-0.20) |
| Ant     | 0.03±0.01                      | 0.03 (0.02-0.04) | 0.03±0.02                    | 0.03 (0.01-0.06) | 0.02±0.00                      | 0.02 (0.02-0.03) | 0.03±0.02                     | 0.02 (0.01-0.04) |
| Flt     | 0.19±0.07                      | 0.18 (0.14-0.26) | 0.14±0.13                    | 0.10 (0.05-0.25) | 0.13±0.04                      | 0.14 (0.08-0.16) | 0.15±0.11                     | 0.14 (0.05-0.26) |
| Pyr     | 0.21±0.08                      | 0.20 (0.15-0.29) | 0.17±0.16                    | 0.13 (0.05-0.29) | 0.24±0.19                      | 0.18 (0.13-0.42) | 0.19±0.16                     | 0.18 (0.05-0.32) |
| BaA     | 0.30±0.15                      | 0.26 (0.19-0.43) | 0.30±0.35                    | 0.14 (0.08-0.66) | 0.28±0.09                      | 0.26 (0.19-0.37) | 0.29±0.28                     | 0.25 (0.08-0.49) |
| Chry    | 0.38±0.16                      | 0.36 (0.25-0.54) | 0.32±0.35                    | 0.16 (0.09-0.65) | 0.26±0.09                      | 0.25 (0.18-0.35) | 0.32±0.28                     | 0.25 (0.09-0.58) |
| BbF     | 0.52±0.20                      | 0.51 (0.33-0.71) | 0.64±0.73                    | 0.40 (0.14-1.85) | 0.66±0.29                      | 0.70 (0.36-0.88) | 0.62±0.57                     | 0.53 (0.17-0.92) |
| BkF     | 0.35±0.13                      | 0.34 (0.23-0.47) | 0.41±0.42                    | 0.24 (0.13-1.02) | 0.56±0.22                      | 0.62 (0.34-0.72) | 0.43±0.35                     | 0.33 (0.15-0.74) |
| BaP     | 0.40±0.20                      | 0.36 (0.24-0.60) | 0.51±0.58                    | 0.25 (0.09-1.62) | 0.50±0.20                      | 0.51 (0.31-0.68) | 0.49±0.44                     | 0.40 (0.09-0.84) |
| IcdP    | 0.90±0.37                      | 0.91 (0.55-1.24) | 1.13±1.31                    | 0.68 (0.21-3.03) | 1.04±0.43                      | 1.06 (0.62-1.38) | 1.07±1.02                     | 0.91 (0.25-1.65) |
| BghiP   | 1.22±0.51                      | 1.18 (0.77-1.72) | 1.38±1.55                    | 0.69 (0.31-3.00) | 1.81±0.74                      | 1.82 (1.15-2.46) | 1.45±1.27                     | 0.96 (0.35-2.82) |
| HMW     | 3.39±1.40                      | 3.30 (2.12-4.73) | 3.84±4.47                    | 1.92 (0.73-10.1) | 4.56±1.78                      | 4.71 (2.83-6.01) | 3.92±3.58                     | 2.73 (0.82-6.58) |
| MMW     | 1.09±0.45                      | 0.99 (0.74-1.51) | 0.94±0.99                    | 0.49 (0.29-1.84) | 0.91±0.37                      | 0.83 (0.58-1.28) | 0.96±0.80                     | 0.80 (0.29-1.65) |
| LMW     | 0.23±0.12                      | 0.25 (0.12-0.34) | 0.25±0.25                    | 0.20 (0.02-0.96) | 0.56±0.56                      | 0.28 (0.13-1.19) | 0.31±0.34                     | 0.21 (0.04-0.79) |
| C-PAHs  | 2.46±1.03                      | 2.38 (1.55-3.44) | 2.76±3.31                    | 1.39 (0.50-7.79) | 3.03±1.21                      | 3.15 (1.81-4.01) | 2.77±2.63                     | 2.05 (0.56-4.21) |
| Σ14PAHs | 4.71±1.92                      | 4.56 (3.01-6.54) | 5.02±5.63                    | 2.69 (1.10-12.2) | 6.03±2.52                      | 6.28 (3.58-8.26) | 5.19±4.54                     | 3.96 (1.23-8.99) |
| T(°C)   | 23.9± 2.2                      | -                | 22.5± 1.8                    | -                | 19.4± 2.0                      | -                | 23.0± 2.4                     | -                |
| RH(%)   | 44.8±22.0                      | -                | 62.4±16.6                    | -                | 56.4± 9.2                      | -                | 58.0±17.0                     | -                |

<sup>a</sup> was determined once, SD: standard deviation, n.d.: not determined, warm-dry season (January to May 2009), rainy season (June to September 2009), cold-dry season (October 2009 to January 2010).
