# Supplementary material
Source: MDPI journal article supplement (https://www.mdpi.com/2076-3298/5/5/62)
Supplement: s1 [file s1]

**Table S2.** PAHs atmospheric concentrations (ng·m<sup>-3</sup>) on PM<sub>2.5</sub> and meteorological conditions in Miravalle site (2009–2010).

| PAHs    | Warm-dry season ( <i>n</i> =5) |                  | Rainy season ( <i>n</i> =11) |                  | Cold-dry season ( <i>n</i> =3) |                  | Annual period ( <i>n</i> =19) |                  |
|---------|--------------------------------|------------------|------------------------------|------------------|--------------------------------|------------------|-------------------------------|------------------|
|         | Mean±SD                        | Median (10-90th) | Mean±SD                      | Median (10-90th) | Mean±SD                        | Median (10-90th) | Mean±SD                       | Median (10-90th) |
| Acy     | 0.17±0.06                      | 0.19 (0.12-0.23) | 0.06±0.06                    | 0.06 (0.01-0.12) | n.d.                           | -                | 0.12±0.08                     | 0.12 (0.01-0.20) |
| Ace     | n.d.                           | -                | 0.04±0.03                    | 0.03 (0.02-0.07) | 0.05 <sup>a</sup>              | -                | 0.04±0.03                     | 0.03 (0.02-0.07) |
| Flu     | n.d.                           | -                | 0.14±0.08                    | 0.14 (0.08-0.20) | 0.15 <sup>b</sup>              | -                | 0.14±0.06                     | 0.14 (0.09-0.20) |
| Phe     | 0.21±0.05                      | 0.20 (0.17-0.26) | 0.20±0.30                    | 0.10 (0.04-0.32) | 0.24 <sup>c</sup>              | -                | 0.21±0.24                     | 0.16 (0.05-0.26) |
| Ant     | 0.09±0.11                      | 0.04 (0.03-0.19) | 0.02±0.01                    | 0.02 (0.01-0.04) | 0.04 <sup>d</sup>              | -                | 0.05±0.07                     | 0.03 (0.01-0.05) |
| Flt     | 0.40±0.25                      | 0.25 (0.20-0.69) | 0.13±0.06                    | 0.14 (0.08-0.20) | 0.13±0.14                      | 0.13 (0.05-0.21) | 0.21±0.18                     | 0.18 (0.06-0.36) |
| Pyr     | 0.46±0.28                      | 0.31 (0.23-0.77) | 0.22±0.28                    | 0.15 (0.08-0.30) | 0.20±0.22                      | 0.20 (0.07-0.32) | 0.29±0.28                     | 0.20 (0.07-0.76) |
| BaA     | 0.67±0.47                      | 0.40 (0.29-1.19) | 0.22±0.15                    | 0.21 (0.10-0.31) | 0.37±0.43                      | 0.37 (0.13-0.62) | 0.36±0.34                     | 0.22 (0.09-0.82) |
| Chry    | 0.86±0.48                      | 0.64 (0.44-1.39) | 0.29±0.16                    | 0.30 (0.13-0.41) | 0.30±0.34                      | 0.30 (0.11-0.50) | 0.45±0.38                     | 0.35 (0.11-0.86) |
| BbF     | 1.33±0.68                      | 1.14 (0.69-2.07) | 0.52±0.47                    | 0.46 (0.19-0.82) | 0.77±0.90                      | 0.77 (0.26-1.28) | 0.77±0.65                     | 0.56 (0.17-1.81) |
| BkF     | 0.81±0.45                      | 0.60 (0.42-1.31) | 0.43±0.31                    | 0.32 (0.21-0.65) | 0.62±0.81                      | 0.62 (0.16-1.08) | 0.56±0.41                     | 0.51 (0.17-1.20) |
| BaP     | 1.03±0.66                      | 0.64 (0.50-1.76) | 0.52±0.34                    | 0.35 (0.20-0.96) | 0.96±1.26                      | 0.96 (0.25-1.67) | 0.71±0.57                     | 0.53 (0.18-1.74) |
| IcdP    | 2.05±1.09                      | 1.77 (1.00-3.21) | 0.89±0.77                    | 0.77 (0.30-1.52) | 0.86 <sup>e</sup>              | -                | 1.25±0.99                     | 0.87 (0.31-2.91) |
| BghiP   | 2.08±1.02                      | 1.75 (1.17-3.20) | 1.12±1.02                    | 1.00 (0.44-1.81) | 1.66±2.7                       | 1.66 (0.50-2.83) | 1.45±1.14                     | 1.03 (0.37-3.22) |
| HMW     | 7.31±3.88                      | 5.84 (3.80-11.5) | 3.40±2.86                    | 3.10 (1.40-5.49) | 4.45±5.65                      | 4.45 (1.25-7.64) | 4.60±3.65                     | 3.55 (1.14-10.8) |
| MMW     | 2.40±1.47                      | 1.47 (1.21-4.02) | 0.87±0.51                    | 0.87 (0.39-1.68) | 1.00±1.13                      | 1.00 (0.36-1.65) | 1.31±1.11                     | 1.03 (0.33-2.44) |
| LMW     | 0.47±0.12                      | 0.42 (0.39-0.60) | 0.28±0.38                    | 0.13 (0.08-0.42) | 0.24±0.34                      | 0.24 (0.05-0.43) | 0.33±0.32                     | 0.27 (0.05-0.54) |
| C-PAHs  | 5.89±3.33                      | 4.48 (2.92-9.51) | 2.50±2.00                    | 2.27 (1.07-3.95) | 3.15±4.02                      | 3.15 (0.88-5.43) | 3.52±2.87                     | 2.74 (0.88-8.05) |
| Σ14PAHs | 10.2±5.32                      | 7.73 (5.50-16.0) | 4.55±3.29                    | 4.37 (1.95-6.99) | 5.69±7.12                      | 5.69 (1.66-9.72) | 6.24±4.74                     | 4.71 (1.58-13.6) |
| T(°C)   | 24.4±1.9                       | -                | 22.2±1.3                     | -                | 21.0±3.2                       | -                | 22.7±2.0                      | -                |
| RH(%)   | 50.1±19.5                      | -                | 72.9±15.7                    | -                | 59.5±14.6                      | -                | 65.1±18.9                     | -                |

<sup>a,b,c,d,e</sup> was determined once, SD: standard deviation, n.d.: not determined, warm-dry season (January to May 2009), rainy season (June to September 2009), cold-dry season (October 2009 to January 2010).
